# Supplementary material for: Affinity improvement of the fully human anti-TSLP recombinant antibody
Source: PubMed Central journal article supplement — Mol Med Rep. 2019 Dec 12;21(2):759–67. doi: 10.3892/mmr.2019.10880 (PMC6947841; doi:10.3892/mmr.2019.10880), 2019-12-12
Supplement: Supplementary_Data.pdf [file Supplementary_Data.pdf]

Figure S1. Pre-mutated and mutated amino acid sequences of human anti-TSLP-single-chain antibody variable fragment. M1, amino acid W mutated to R; M2, amino acid W mutated to K; M4, amino acid W mutated to L, M5, amino acid W mutated to E. The red boxes indicate the sites of the mutation.

| Range 1: 1 to 248 <a href="#">Graphics</a> <span style="float:right">▼ Next Match ▲ Previo</span> |                |                              |              |              | Range 1: 1 to 248 <a href="#">Graphics</a> <span style="float:right">▼ Next Match ▲ Previous Match</span> |                |             |                              |              |              |           |
|---------------------------------------------------------------------------------------------------|----------------|------------------------------|--------------|--------------|-----------------------------------------------------------------------------------------------------------|----------------|-------------|------------------------------|--------------|--------------|-----------|
| Score                                                                                             | Expect Method  | Identities                   | Positives    | Gaps         | Score                                                                                                     | Expect Method  | Identities  | Positives                    | Gaps         |              |           |
| 496 bits(1278)                                                                                    | 0.0            | Compositional matrix adjust. | 247/248(99%) | 247/248(99%) | 0/248(0%)                                                                                                 | 497 bits(1279) | 0.0         | Compositional matrix adjust. | 247/248(99%) | 247/248(99%) | 0/248(0%) |
| Query 1                                                                                           | *****          | 60                           |              |              | Query 1                                                                                                   | *****          | 60          |                              |              |              |           |
| Sbjct 1                                                                                           | *****          | 60                           |              |              | Sbjct 1                                                                                                   | *****          | 60          |                              |              |              |           |
| Query 61                                                                                          | *****          | FDIWGQGMIVT                  | 120          |              | Query 61                                                                                                  | *****          | FDIWGQGMIVT | 120                          |              |              |           |
| Sbjct 61                                                                                          | *****          | FDIWGQGMIVT                  | 120          |              | Sbjct 61                                                                                                  | *****          | FDIWGQGMIVT | 120                          |              |              |           |
| Query 121                                                                                         | SSGGGSGGGSGGGG | *****                        | 180          |              | Query 121                                                                                                 | SSGGGSGGGSGGGG | *****       | 180                          |              |              |           |
| Sbjct 121                                                                                         | SSGGGSGGGSGGGG | *****                        | 180          |              | Sbjct 121                                                                                                 | SSGGGSGGGSGGGG | *****       | 180                          |              |              |           |
| Query 181                                                                                         | *****          | 240                          |              |              | Query 181                                                                                                 | *****          | 240         |                              |              |              |           |
| Sbjct 181                                                                                         | *****          | 240                          |              |              | Sbjct 181                                                                                                 | *****          | 240         |                              |              |              |           |
| Query 241                                                                                         | LEIKRAAA       | 248                          |              |              | Query 241                                                                                                 | LEIKRAAA       | 248         |                              |              |              |           |
| Sbjct 241                                                                                         | LEIKRAAA       | 248                          |              |              | Sbjct 241                                                                                                 | LEIKRAAA       | 248         |                              |              |              |           |
|                                                                                                   |                | <b>M1</b>                    |              |              |                                                                                                           |                | <b>M2</b>   |                              |              |              |           |
| Range 1: 1 to 248 <a href="#">Graphics</a> <span style="float:right">▼ Next Match ▲ Previo</span> |                |                              |              |              | Range 1: 1 to 248 <a href="#">Graphics</a> <span style="float:right">▼ Next Match ▲ Previous Match</span> |                |             |                              |              |              |           |
| Score                                                                                             | Expect Method  | Identities                   | Positives    | Gaps         | Score                                                                                                     | Expect Method  | Identities  | Positives                    | Gaps         |              |           |
| 497 bits(1279)                                                                                    | 0.0            | Compositional matrix adjust. | 247/248(99%) | 247/248(99%) | 0/248(0%)                                                                                                 | 497 bits(1280) | 0.0         | Compositional matrix adjust. | 247/248(99%) | 247/248(99%) | 0/248(0%) |
| Query 1                                                                                           | *****          | 60                           |              |              | Query 1                                                                                                   | *****          | 60          |                              |              |              |           |
| Sbjct 1                                                                                           | *****          | 60                           |              |              | Sbjct 1                                                                                                   | *****          | 60          |                              |              |              |           |
| Query 61                                                                                          | *****          | FDIWGQGMIVT                  | 120          |              | Query 61                                                                                                  | *****          | FDIWGQGMIVT | 120                          |              |              |           |
| Sbjct 61                                                                                          | *****          | FDIWGQGMIVT                  | 120          |              | Sbjct 61                                                                                                  | *****          | FDIWGQGMIVT | 120                          |              |              |           |
| Query 121                                                                                         | SSGGGSGGGSGGGG | *****                        | 180          |              | Query 121                                                                                                 | SSGGGSGGGSGGGG | *****       | 180                          |              |              |           |
| Sbjct 121                                                                                         | SSGGGSGGGSGGGG | *****                        | 180          |              | Sbjct 121                                                                                                 | SSGGGSGGGSGGGG | *****       | 180                          |              |              |           |
| Query 181                                                                                         | *****          | 240                          |              |              | Query 181                                                                                                 | *****          | 240         |                              |              |              |           |
| Sbjct 181                                                                                         | *****          | 240                          |              |              | Sbjct 181                                                                                                 | *****          | 240         |                              |              |              |           |
| Query 241                                                                                         | LEIKRAAA       | 248                          |              |              | Query 241                                                                                                 | LEIKRAAA       | 248         |                              |              |              |           |
| Sbjct 241                                                                                         | LEIKRAAA       | 248                          |              |              | Sbjct 241                                                                                                 | LEIKRAAA       | 248         |                              |              |              |           |
|                                                                                                   |                | <b>M4</b>                    |              |              |                                                                                                           |                | <b>M5</b>   |                              |              |              |           |

Figure S2. Amplification of scFv and signal peptide (sp)-scFv-Fc by PCR. (A) Amplification of scFv by PCR (84, sequence prior to mutation; M4, mutated sequence). (B) Amplification of sp-scFv-Fc by PCR. scFv, single-chain antibody variable fragment.

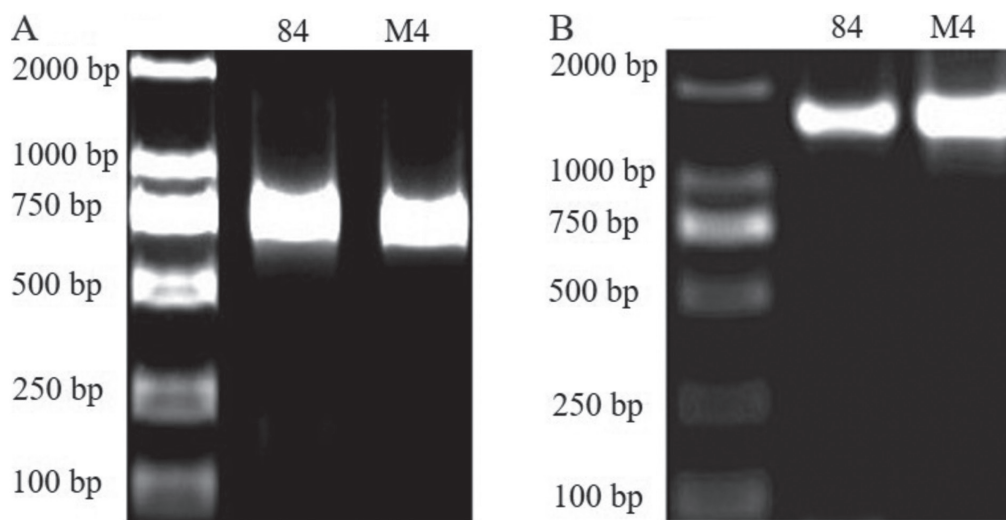

Figure S3. Construction of the PMH3<sup>EN</sup>-sp-scFv-Fc-84/M4 recombinant plasmid. (A) The pcDNA3.1 vector was digested with *Hind*III and *Not*I, the products of sp-scFv-Fc-84 and M4 were detected by agarose gel electrophoresis. The mutated M4 gene were obtained from 84 gene. Each lane represents a different clone. (B) The sp-scFv-Fc-84 (pre-mutated sequence) and sp-scFV-Fc-M4 (mutated sequence) in pcDNA3.1 were amplified by PCR, digested with *Hind*III and *Not*I, and ligated using T4 ligase into PMH3<sup>EN</sup> (digested with *Hind*III and *Not*I) to generate the PMH3<sup>EN</sup>-sp-scFv-Fc recombinant vector. The scFv-84 and scFv-M4 products were detected by agarose gel electrophoresis. scFv, single-chain antibody variable fragment.

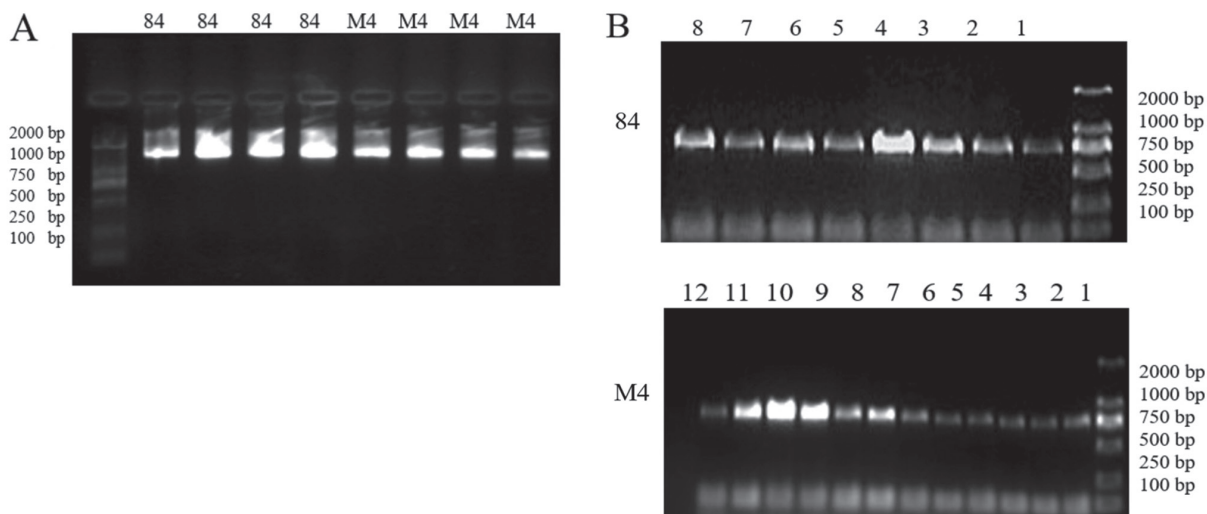

Table SI. Amino acids mutated to improve affinity of the single-chain antibody variable fragment.

---

| Amino acid    | Mutated amino acid | Mutated base sequence |
|---------------|--------------------|-----------------------|
| M1, TRP (109) | ARG                | CGU/CGC/CGA/CGG       |
| M2, TRP (109) | LYS                | AAA/AAG               |
| M3, TRP (109) | TYR                | UAU/UAC               |
| M4, TRP (109) | LEU                | CUU/CUC/CUA/CUG       |
| M5, TRP (109) | GLU                | GAA/GAG               |

---

109 is the amino acid number in the protein sequence and TRP is 109th amino acid in variable the region.

---

Table SII. Design of primers for single amino acid mutation of scFv.

| Primer name    | Primer sequence                    |
|----------------|------------------------------------|
| M1             |                                    |
| scFv84MR1-TSLP | 5'-TCAAAAGCCCGTTCCCCTCTCGCACAG-3'  |
| scFv84MF1-TSLP | 5'-GGAACGGGCTTTTGATATCTGGGGCCA-3'  |
| M2             |                                    |
| scFv84MR2-TSLP | 5'-ATCAAAAGCCTTTTCCCCTCTCGCACAG-3' |
| scFv84MF2-TSLP | 5'-GGAAAAGGCTTTTGATATCTGGGGCCA-3'  |
| M3             |                                    |
| scFv84MR3-TSLP | 5'-TCAAAAGCGTATTCCCCTCTCGCACAG-3'  |
| scFv84MF3-TSLP | 5'-GGAATACGCTTTTGATATCTGGGGCCA-3'  |
| M4             |                                    |
| scFv84MR4-TSLP | 5'-TCAAAAGCCAGTTCCCCTCTCGCACAG-3'  |
| scFv84MF4-TSLP | 5'-GGAACTGGCTTTTGATATCTGGGGCCA-3'  |
| M5             |                                    |
| scFv84MR5-TSLP | 5'-TCAAAAGCCTCTTCCCCTCTCGCACAG-3'  |
| scFv84MF5-TSLP | 5'-GGAAGAGGCTTTTGATATCTGGGGCCA-3'  |
| scFv84         |                                    |
| scFv84F-TSLP   | 5'-CATGCCATGGCCGGCCAGCCGGCCC-3'    |
| KM168          | 5'-CTGAGTAGAAGAAGCTCAAACCTA-3'     |

F, forward; R, reverse; scFv, single-chain antibody variable fragment; TSLP, thymic stromal lymphopoietin; KM168, reverse primer of vector *pLZ16*.
